# Supplementary material for: Honderd jaar TSG: terugblik en toekomst
Source: Springer Nature journal article supplement (doi:10.1007/s12508-022-00360-z), 2022-10-28
Supplement: MOESM1 [file 23665670]

# TIJDSCHRIFT VOOR SOCIALE GENEESKUNDE

tevens Orgaan van de: „Nederlandsche Vereeniging van Schoolartsen”, de „Nederlandsche Vereeniging van Gemeentelijke Geneeskundige Verzorging”  
en mededeelingen bevattende van de „Vereeniging voor Sociale Kinderhygiëne”

Vroeger „Sociaal Medisch Maandschrift”

Abonnementprijs per jaar bij vooruitbetaling  
franco per post voor Nederland f 6.— voor  
Buitenland en Koloniën f 7.50

H. J. PARIS  
UITGEVER  
AMSTERDAM

Advertentiën: f 0.50 per regel — Adres  
v. d. Administratie: N. Z. Voorburgwal 262,  
Amsterdam, Telefoon 5789 N.

## REDACTIE:

Dr. C. J. BRENKMAN

Beheerend Redacteur  
Adres: Okeghemstraat 25 — Amsterdam

Arts H. F. FLEISCHER

Mevr. Dr. A. M. FURSTNER-RISSELADA

Dr. D. HERDERSCHÉE — Dr. J. LUBSEN Nzn.

en Arts W. P. WOLFFENSPERGER

## MEDEWERKERS:

Dr. H. ALDERSHOFF, *Inspecteur van de Volksgezondheid, Utrecht* — Dr. J. VAN ASSEN Jzn., *Geneesheer v. d. Adriaanstichting, Hillegersberg* — Prof. Dr. J. M. BAART DE LA FAILLE, *Hoogleraar in Sociale Geneeskunde, Utrecht* — Arts CHRISTINE BADER, *Inspectrice voor de Hygiëne v. h. Kind, Arnhem* — Dr. G. W. BOLAND, *Directeur v. d. Gem. Geneeskundigen Dienst te 's-Gravenhage* — Arts J. H. G. CARSTENS, *Secretaris van de Ned. Vereen. tot Bescherming van Zuigelingen, Utrecht* — Dr. F. DELHEZ, *Secretaris der Artsen-Gheel-onthouders-Vereen., Dordrecht* — Arts P. H. VAN EDEN, *Medisch Adviseur R.V.B.* — Dr. J. PH. ELIAS, *Schoolarts te Rotterdam* — Mr. J. EVERTS, *Secretaris v. d. Armenraad* — Arts J. E. FEISSER, *Secretaris d. Vereen. v. Sociale Kinderhygiëne, Groningen* — Dr. J. B. F. VAN GILS, *Secr.-Penningm. van de Ned. Centrale Vereeniging tot Bestrijding der Tuberculose, 's-Gravenhage* — Mr. A. DE GRAAF, *Utrecht* — Mevr. DE GRAAF VAN DER ELST, *Voorzitster Ned. Verbond v. Vroedvrouwen* — Dr. C. H. VAN HERWERDEN, *Directeur v. d. Gem. Geneesk. Dienst te Rotterdam* — Arts L. HEIJERMANS, *Directeur v. d. Gem. Geneesk. Dienst te Amsterdam* — Dr. M. R. HEYNSIUS VAN DEN BERG, *Directeur Consultatiebureau v. Tuberculose, Amsterdam* — Dr. M. VAN DER HOEVE, *Directeur v. d. Gem. Geneeskundigen Dienst te Amersfoort* — Dr. N. M. JOSEPHUS JITTA, *Voorzitter Gezondheidsraad, 's-Gravenhage* — Ir. A. KEPPLER, *Directeur Woningdienst, Amsterdam* — Prof. Dr. TH. M. VAN LEEUWEN, *1e Secretaris Ned. Vereen. tot Bestrijding v. Geslachtsziekten, Utrecht* — Dr. F. S. MEIJERS, *Amsterdam* — H. VAN DER MOLEN, *Tandarts, Leider v. d. tandheelkundige polikliniek v. d. Gem. Gen. Dienst van Amsterdam* — Arts G. OOSTERBAAN, *Hoofdinspecteur Volksgezondheid, 's-Gravenhage* — Dr. A. SCHUCKINK KOOL, *Directeur v. d. Gem. Geneesk. Dienst te Utrecht* — Dr. J. H. TUNTLER, *Inspecteur Volksgezondheid, Groningen* — Arts W. F. VELTHUYZEN, *2e Secretaris Ned. Vereen. tot Bestrijding der Geslachtsziekten.*

## INLEIDING

Het orgaan onzer beide vereenigingen heeft een andere jas aangetrokken, de titel is gewijzigd, en ook de uitgever — thans een Amsterdamer — is een ander geworden. Onze vereenigingen sloten een nieuw contract met den uitgever H. J. Paris en de redactie, die in den loop van 1922 heel wat vergaderingen besteedde aan de verandering van uitgever, is vol goeden moed dat het Tijdschrift in zijn nieuwen vorm zal voortgaan in groei. Er zijn allerlei plannen; wij hopen dat het gelukken zal deze ten uitvoer te brengen; wij stellen ons voor dat deze periodiek moet worden een veertiendaagsche. Het onderwerp dat wij behandelen, is van een dusdanig belang en van een belang voor zoo heel velen in den lande, dat een maandschrift op den duur niet voldoende zal zijn. Wij bepalen ons tot sociaal-geneeskundige vraagstukken; wij willen deze wetenschappelijk belichten, maar stellen er toch hoogen prijs op, dat ons tijdschrift een baken zij voor ontwikkelde leeken. Deze laatsten stellen — laten wij het maar onomwonden zeggen — vaak meer belang in het sociaal-geneeskundige werk dan sommige artsen. Toch neemt ook onder hen de belangstelling hiervoor meer en meer toe; ook in kleinere plaatsen, ook ten plattelande gaan de medici beseffen, dat de zorg voor moeder en kind, voor den tuberculoselijder, voor het schoolkind moet worden georganiseerd; zij voelen, dat hier het individu niet opzichzelfstaand werk moet verrichten, maar dat er systeem in moet worden gelegd, zonder welk het altijd brokkenwerk blijft. Ook voor verplegenden en voor vroedvrouwen stellen

wij ons voor, dat ons orgaan steeds meer belangwekkende artikelen zal bevatten. Naar onze overtuiging zullen de arts, de vroedvrouw en de verpleegster elkaar meer en meer vinden, juist door het sociaal-geneeskundige deel van hun taak.

Onze vereenigingen zijn de ruggegraat van het Tijdschrift; mogen de leden dat te allen tijde beseffen en toonen door hun gewaardeerde medewerking. We hebben veel lezers, maar ook veel werkers noodig. De redactie moet het orgaan niet volschrijven. Om een beeld te geven van wat omgaat onder de sociaal-geneeskundigen van Nederland moeten deze in groote getale van hun meeningen in het tijdschrift doen blijken. Ook artikelen van niet-geneeskundigen, van ingenieurs, van juristen, kortom van allen die werken op het terrein der geneeskundige voorzorg zullen steeds van harte welkom zijn. En dan wordt het een spiraalgang: hoe belangwekkender de inhoud wordt, des te meer lezers zal ons Tijdschrift krijgen.

Dit dan tot onze tegenwoordige lezerskring. En tot allen, die er over denken zich als abonné aan te melden, zeggen wij, dat wij vele onderwerpen aan de orde denken te stellen. Wij hebben ons verzekerd van een staf van medewerkers, van wie wij alle reden hebben te verwachten, dat zij *daadwerkelijke* medewerkers zullen blijken te zijn.

Regelmatig zullen rubrieken ingericht worden betreffende het *geneeskundig schooltoezicht* in den meest uitgebreiden zin van het woord; regelmatige besprekingen van de literatuur op dit gebied; schooltandheelkunde; het abnormale kind en de inrichtingen, die voor hem gemaakt zijn; bestrijding van de volksziekten voorkomende onder schoolkinderen. Dan een rubriek: *zuigelingen*zorg, met inbegrip van de zorg voor de jonge moeder, voor de zwangere vrouw en wel speciaal voor de buitenechtelijk zwangere en voor het onwettige kind; ook de kleinkinderbewaarplaatsen zullen hierbij ter sprake komen.

*De geneeskundige controle, de beroepshygiene, de mond- en tandverzorging, de voorkoming en bestrijding van geslachtsziekten en andere be-*

## INHOUD:

|                                          | Pag. |
|------------------------------------------|------|
| Inleiding                                | 1    |
| Het Doel der Sociale Geneeskunde         | 3    |
| Prof. Dr. J. M. BAART DE LA FAÏLLE       |      |
| De Melkvoorziening der Grooten Steden    | 5    |
| Dr. I. H. J. VOS                         |      |
| Gediplomeerde Bakers (Kraamverzorgsters) | 9    |
| Dr. C. J. BRENKMAN                       |      |
| Congres Kraamverzorging                  | 11   |
| KINDERSTUDIE EN SCHOOLHYGIËNE            | 12   |
| De Beoordeeling der Persoonlijkheid      |      |
| Dr. D. HERDERSCHËE                       |      |
| MOEDER EN ZUIGELING                      | 13   |
| Zuigelingenzorg te Mannheim              |      |
| STATISTIEK                               | 14   |
| Gezondheidstoestand in Duitsland         |      |
| Pokken en Vaccinatie                     |      |
| NIEUWS UIT DE VEREENIGINGEN              | 15   |
| DIENSTEN                                 | 18   |
| BERICHTEN                                | 18   |

*smettelijke ziekten*, waarbij ook de geneeskundige dienst in onze havens niet zal worden vergeten, zullen worden behandeld, ook zal een rubriek worden ingericht voor de *medische statistiek*, die nog bijna overal als stiefkind wordt behandeld. Misschien minder regelmatig, maar dan toch herhaaldelijk zal plaats worden ingeruimd voor de bestrijding van het *alcoholisme* en zoo zullen er nog meer onderwerpen zijn, die hier niet alle met name genoemd kunnen worden. Dat de *algemeene sociale geneeskunde*, als: organisatorische arbeid op dit gebied, de sociale wetgeving en dergelijke niet zullen ontbreken spreekt wel van zelf. Op een andere plaats in dit nummer kunnen wij reeds een paar artikelen aankondigen die binnenkort zullen geplaatst worden.

En zoo gaat dan ons Tijdschrift zijn nieuwe loopbaan beginnen. In 1922 nam het aantal abonné's flink toe, wij hopen dat dit in 1923 crescendo zal gaan en bevelen onze periodiek in uw aller daadwerkelijke belangstelling aan.

DE REDACTIE

## HET DOEL DER SOCIALE GENEESKUNDE

door

Prof. Dr. J. M. BAART DE LA FAILLE  
Hoogleraar aan de Rijksuniversiteit te Utrecht

De onverwachte, ernstige ziekte van een onzer verwanten of vrienden heeft onze belangstelling om meer dan een reden. De slepende ziekte en de vroegtijdige dood van een huisvader kan belangrijke gevolgen hebben voor de welvaart van zijn gezin. Het ziektegeval kan zelfs leerrijk zijn voor de geneeskundige wetenschap. De wijze, waarop de patiënt wordt behandeld, is voor een deel afhankelijk van diens eigen wil door de keuze van zijn arts en door de beschikking over zijn eigen lichaam, wanneer een ingrijpende operatie wordt voorgesteld. Overigens zijn naast de geneeskundige aanwijzingen voor een bepaalde behandelingsmethode ook financiële overwegingen niet zonder beteekenis.

In tegenstelling met de genoemde belangen en omstandigheden, waarvan het zieke individu het middelpunt is, kan men gezondheid, ziekte, vroegtijdige dood en geneeskundige verzorging ook uit een algemeen oogpunt beschouwen en in den patiënt zien het lid der gemeenschap en kan men zijne ziekte van beteekenis achten als maatschappelijk verschijnsel, dat niet alleen het medelijden opwekt doch ook van economisch belang is voor de samenleving. De volkskracht wordt gebaat door een gezond geslacht, dat weerstandsvermogen bezit en van incidenteele ziekten zoo volledig mogelijk herstelt.

De ervaring leert, dat onder zekere levensomstandigheden afhankelijk b.v. van woonplaats en klimaat, de eene bevolking meer dan de andere heeft te lijden van sommige ziekten, en verder dat elke groep dier bevolking door een bepaalde ziekte niet in dezelfde mate wordt

aangetast. Er zijn z.g. kinderziekten en er zijn b.v. vergiftigingen, die eigen zijn aan het beroep, dat een werkman uitoefent. Onderscheidt men nu de menschen naar bepaalde kenmerken, zooals het geslacht, den leeftijd, den aard hunner dagelijksche werkzaamheden, den welstand, dan blijkt, dat er verband bestaat tusschen het gezondheidspeil van zulk een klasse of sociale groep van personen en hun bijzondere levensvoorwaarden. En wanneer men die laatste dan gaat ontleden en tevens nagaat welke de schadelijke factoren zijn, die bovenmatig hun nadeeligen invloed doen gelden op den gezondheidstoestand van zulk een groep, dan krijgt men dikwijls een rationeel punt van uitgang, om een ziekte te bestrijden.

Indien door een ziekte- of sterftestatistiek is aangetoond, dat longtering in een land of stad meer voorkomt onder de armen dan onder de welgestelden en dat het beloop dezer ziekte veel ongunstiger is in de eerste dan in de andere maatschappelijke groep, dan is het de taak van de sociale geneeskunde om maatregelen te beramen, welke die noodlottige verhouding kunnen veranderen ten goede. Die maatregelen, hetzij zij door het particulier initiatief ontstaan, hetzij zij door de overheid worden genomen kosten geld, maar beoogen, behoudens hun humanitair karakter, productief te zijn voor de gemeenschap; zij behooren dus doelmatig te zijn: bij de groote uitgaven, die op het spel staan, moet worden gevraagd, hoe deze het nuttigst worden aangewend.

In het eene geval wordt meer effect verwacht van algemeene hygienische maatregelen bij de wet of bij gemeentelijke verordening ingesteld, of wel van bijzondere voorschriften voor een bepaalde categorie van personen, die men tracht op te voeden in de gezondheidsleer, omdat hun medewerking noodzakelijk wordt vereischt. In een ander geval echter wordt de zorg van een vereeniging of van een openbare instelling

*H. H. Medewerkers gelieven zich voor overdrukken hunner artikelen te wenden tot den uitgever. De tekst van dit nummer blijft in verband daarmee nog enkele dagen, na verschijning dezes, staan. In het vervolg gelieve men vóór het afdrukken te melden of men overdrukken wenscht.*

gericht op de lijders, die men allereerst tracht op te sporen om hen daarna geneeskundig te doen behandelen. Vooral dit laatste dient te geschieden volgens een systeem, dat overeenkomstig de ervaring, opgedaan bij tal van dergelijke lijders, een bepaald resultaat belooft. Men spreekt wel van doelbewuste bestrijding van volksziekten en bedoelt daarmee, dat niet zoozeer aan de bijzondere wenschen van een aantal patienten wordt tegemoet gekomen, gelijk in de particuliere geneeskundige praktijk der welgestelden geschiedt, maar dat in de eerste plaats wordt gevraagd naar het effect, dat voor de verbetering der volksgezondheid, voor de verhooging van de volkskracht mag worden verwacht en bij welke groep het aangrijpingspunt der te nemen maatregelen het gunstigst is. Naast dit curatieve element blijft voor het caritatieve nog een ruime plaats over, wanneer de personen, die zich aan de uitvoering der sociaal-geneeskundige maatregelen wijden, artsen en verzorgsters, menschen zijn met een warm hart en wanneer aan de particuliere liefdadigheid nog gelegenheid wordt gegeven zich te uiten, waar de overheidszorg ophoudt.

Dus bij de toepassing der sociale geneeskunde, die op wetenschappelijken grondslag behoort te staan, die als het ware het grensgebied vormt tusschen de sociologische en de geneeskundige wetenschappen, komt het vooral aan op een doelmatige, economisch werkende organisatie, die rekening houdt met den tegenwoordigen stand der geneeskunst. Daardoor wordt tijd, geld en werkkraft van de geneeskundigen en van hunne hulpkrachten gespaard.

Ofschoon toegepaste hygiëne, dus gezondheidszorg dikwijls niet te scheiden is van de eigenlijke geneeskunst, welke met een sociale bedoeling ten bate komt van zieken, die zelfstandig met eigen middelen niet hetzelfde zouden kunnen bereiken, zal in dit tijdschrift meer in

het bijzonder aan de sociale geneeskunst aandacht worden geschonken. Naast de uitgebreide ziekenverzorging van alle onvermogenen, die op de hulp van de gemeente zijn aangewezen, naast de ziekenverzorging van die klasse der bevolking, welke door verzekeringsinstellingen althans ten deele in hun behoefte aan geneeskundige hulp kunnen voorzien, zijn het ook kleinere groepen, die de aandacht vragen, zooals de schoolkinderen, omdat hunne behoeften uit een oogpunt van volksgezondheid en geneeskundige behandeling van bijzonderen aard zijn. Het milieu, waarin zij een aantal uren per dag verkeerden, n.l. de school, de aandraking met een groot aantal mede-scholieren, de eigenaardigheden van het wassende lichaam gedurende de schooljaren, de gemakkelijker, waarmee een geneeskundig onderzoek systematisch zonder groote kosten en tijdverlies plaats vindt, maken juist een dergelijke groep tot een object van vruchtbaar onderzoek en desgewenscht van massale geneeskundige behandeling zooals reeds bij hoofdzeer (favus) en andere uitwendige besmettelijke ziekten is gebleken. Van den aard der ziekte en van ethische opvattingen hangt het verder af, in hoeverre het recht en de plicht der ouders dienen te worden geëerbiedigd tegenover de gezondheidsbelangen der gemeenschap, indien deze laatste mochten gaan lijden.

Hoe de gedragslijn zal zijn van de overheid tegenover anti-sociale elementen in de samenleving en tegenover medeburgers die gemoedsbezwaren hebben, is naar mijne meening een vraag van politiek, waarop het antwoord niet alleen door de geneeskundigen, zelfs niet door de sociaal-geneeskundigen moet worden gegeven.

*Beschikbaar*

## DE MELKVOORZIENING DER GROOTE STEDEN

door

Dr I. H. J. VOS

Wethouder van Amsterdam

### Inleiding

Het is merkwaardig te zien, hoe de economie van alle tijden het zwaartepunt heeft gelegd in de productie. Of de staathuishoudkundigen zich betitelden met den naam van physiocraat dan wel met dien van socialist, altijd was de voortbrenging het uitgangspunt van hun beschouwingen; nu eens was het weliswaar de landbouw, dan weer een ander productiemiddel, dat de grootste beteekenis in hun denkwijze innam, doch in principe was er nagenoeg geen verschil. De distributie althans vervulde in alle systemen een ondergeschikte rol; misschien was het wel zóó, dat men deze als een onderdeel van de eigenlijke voortbrenging beschouwde. Hoe dit alles ook zij, het boven geschetste verschijnsel behoeft niet te worden geloofend. Wellicht zal in de toekomst een verandering in deze werkmethode niet uitblijven. Ook in dit opzicht toch zien we wijzigingen in de sociaal-economische organisatie onzer maatschappij, die steeds meer relief verleen aan de distributie, omdat toestanden en vooral ook misstanden ten dezen opzichte een onevenredig grootere beteekenis gaan verkrijgen met het voortschrijden der maatschappelijke ontwikkeling.

Laat ons vóór alles verduidelijken, waardoor deze meening moet worden gestaafd. In vroegere stadia der maatschappij had de verdeling der goederen inderdaad een geringe economische waarde. Het productieproces opgelost zijnde, bleef er aanvankelijk heel weinig te doen over.

Zelfs voor een vrij ver gevorderd stadium der samenleving gold deze stelregel nog. Men beheerschte de productie en daarmee de verdeling der voortgebrachte artikelen zoolang men zich bewust was van den gang dezer artikelen van de bron tot aan den consument, zoolang men dus als het ware te maken had met een gedachten- en ontwikkelingsgang, waarin geen onbekenden voorkwamen. Totdat op een gegeven oogenblik een onbekende werd

ingeschakeld en dat wel, toen het ruilproces plaats ging maken voor de voortbrenging voor de vrije markt. De maatschappelijke evolutie, beheerscht door de bevolkingsvermeerdering, versterkte de tendenzen, die daardoor waren gekweekt. En hoe meer factoren de grenzen en de constellatie-teekening van het afzetgebied der producten verdoezelden en vervaagden, des te meer kwamen de bezwaren van den niet of onvoldoend georganiseerde verdeling der voortgebrachte goederen te voorschijn.

De kapitalistische voortbrenging met de door haar ingeleide ontwikkeling der demographische verhoudingen heeft aan alle sociaal-economische vormen een ander aspect gegeven.

De wereldsteden, zooals de moderne tijd ze ons doet kennen, vertegenwoordigen feitelijk een gansch andere wereld dan de dorpen uit vorige eeuwen, die nog een verlengstuk van de „familiehuishouding” onzer oer-maatschappij beteekenden.

Deze vorming van vrij amorphe menschenmassa's heeft een revolutie tengevolge gehad van alles, wat de samenleving raakt: de persoonlijke verhoudingen, zeden en gewoonten, etc. alles heeft den invloed ondergaan van deze evolutie, die ingeleid is door de ontdekking en de invoering der machines. Men kan breedvoorige beschouwingen ten beste geven over de vraag, of ten slotte ook deze ontdekking der machinale voortbrenging niet een gevolg geweest is van den aanwas der bevolking en van den daardoor ontstanen prikkel om op meer intensieve, economische wijze in de vergrootte behoefte te voorzien. Wat daarvan zij, vast staat, dat er een causale samenhang en wisselwerking bestaat tusschen de verandering in de voortbrengingswijze en die in de demographische verhoudingen.

De vraag rijst nu, in hoeverre de distributie zich aan deze wijzigingen heeft aangepast of liever nog in hoeverre een aanpassing noodzakelijk is gebleken. Het is wel typeerend voor de waardeering van deze economische verschijningsvorm, dat slechts zeer weinig economen zich zelfs in de laatste halve eeuw het hoofd met dit probleem gebroken hebben. En toch is het verrassend te zien, in welk een laag-georganiseerd stadium juist de voedselvoorziening, en vooral de distributie, gebleven is. Hier en daar

heeft een nieuwe organisatorische vorm burgerrecht verkregen, welke beteekenis in het algemeen gelegen is in de samenwerking van meerdere belanghebbenden en de vorming van door concentratie van energie verkregen nieuwe sociaal-economische eenheden.

We betreden hier het terrein der coöperaties, die zich vooral aan de zijde der producenten hebben ontwikkeld, maar die toch ook, alhoewel meestal met minder succes, in den vorm van consumentenverenigingen, bestaansrecht hebben trachten te verkrijgen.

Het zijn vooral de socialistische doctrinaire schrijvers geweest, die voor een van bovenaf doorgevoerde organisatie der distributie hebben gepleit. En het is thans feitelijk een strijd geworden tusschen twee extreme doctrines, die elkaar den voorrang betwisten. Eenerzijds staan de vertegenwoordigers der socialisatie, daartegenover de verdedigers van de leer der absolute onthouding op het gebied der distributie. En in de hitte van dien strijd, die nog sterk onder den invloed staat van ervaringen in den oorlogstijd opgedaan, heeft het den schijn, alsof verandering niet noodig is en alsof er geen geëigende tusschenweg zou bestaan, die een geleidelijke ontwikkeling tot een doeltreffende organisatie kan waarborgen.

Mij althans staat het duidelijk voor oogen :

1°. dat de organisatie-vorm der distributie niet meer klopt op de voortgeschreden maatschappelijke ontwikkeling,

2°. dat het distributief apparaat thans meer zijn kracht ontleent aan het uitbuiten der particuliere energie dan aan een technisch-economisch waardevolle organisatie,

3°. dat de overheid de plicht heeft leidend, regelend en steunend op te treden, teneinde de in het maatschappelijk leven aanwezig zijnde vormen en krachten gelegenheid te geven zich uit den huidige toestand van betrekkelijke anarchie te ontwikkelen tot nieuwe eenheden, sociaal-economische concentratievormen, die de rol van den vroegeren eenling in het distributieproces moeten vervullen.

Is het niet merkwaardig, dat er in vele opzichten op dit terrein maar een bitter klein weinigje onderscheid bestaat tusschen de voedselvoorziening der wereldsteden en der kleinste dorpen. Ja, wij zeiden het reeds, hier en daar is

een jonge knop uitgeboden aan den ouden boom. Wij kennen de samenwerking der kweekers in den vorm van hun veilingen, die der zuivelproducenten in hun coöperaties, maar zij behooren tot de bescheiden uitzonderingen. Wat beteekent deze evolutie tegenover de vorming der producententrusts en kartels op het gebied der voortbrenging! En dan, hoe weinig doorgewerkt heeft dan nog het beginsel, dat aan die ontwikkeling ten grondslag ligt! Is niet de eenheid bij de voedselvoorziening in overwegende mate de eenling, die als zoodanig in het niet zinkt tegenover de gigantische omwenteling in den geheelen bovenbouw onzer samenleving?

Zie den zwoegenden warmoezenier, door een moeizaam bestaan aan het meestal geërfde stukske grond gekluisterd, aanschouw den kleinen keuterboer en ook den nijveren, ploeterenden melkslijter! Maar merk bovenal op den geringen samenhang bij de betreffende belanghebbenden, ook al hebben kleine directe belangen hen nu en dan in verenigingen saamgebracht! Een organisatie van het distributief apparaat ontbreekt geheel, haar werking is nagenoeg geheel gebonden aan een toevalligen, door overerving min of meer gefixeerden, verschijningsvorm, die in principe en in wezen in den loop der tijden vrijwel niet veranderd is.

En wel het meest opmerkenswaardige is de bijzondere differentiatie in de sociaal-economische formatie met betrekking tot een bepaald voedingsmiddel, zooals de melk.

Want daar waar de melk wordt verwerkt tot zuivelproducten, is het bedrijf wel uit het „atavistisch” stadium getreden en vervullen de coöperatieve zuivelfabrieken wel een functie van hogere orde, terwijl op het engere terrein der melkvoorziening de primitieve vorm nagenoeg ongerept gehandhaafd is. Wel bestaan er bonden van melkveehouders, doch deze behartigen niet anders dan de zuiver materiele belangen der betrokkenen. Een ideëel motief ligt aan deze „vakverenigingen” niet ten grondslag. Hoe zou het ook anders kunnen!? De bestaande anarchie geeft aanleiding tot een moordende concurrentie en vernietigt de basis voor iedere poging om tot verbetering van de toestanden in het bedrijf of van het product te geraken. Zoodat sinds jaar en dag tegen de

deprimeerende factoren en tendenzen het eenig tegenwicht was gelegen in een, van nagenoeg alle paedagogisch inzicht gespeend, repressief optreden van de gemeentelijke overheid en de poenale sanctie van den rechter.

Het behoeft dan ook geen verwondering te wekken, dat het „melkgebied” om de groote steden, d.w.z. dus de streken vanwaar de melk naar de stad wordt aangevoerd, in het meest primitieve stadium verkeert. Doch daarnevens is het duidelijk, dat hier de ontwikkeling achtergebleven is tengevolge van allerlei oorzaken, waarvan stellig een der belangrijkste gezocht moet worden in een souvereine onverschilligheid van de overheid.

In de groote steden hebben de melkinrichtingen voor een deel de taak der melkslijters overgenomen. Dat is althans een der voordeelen geweest, die het einde der vorige eeuw heeft gebracht. Maar toch tellen de steden naast eenige van deze moderne inrichtingen nog altijd honderden, dikwijls meer dan duizend, melkslijters die op ouderwetsche wijze hun bedrijf uitoefenen. En voor hen, die het maatschappelijk gebeuren met eenig begrip van zaken bezien, rijst onwillekeurig de vraag naar de doelmatigheid en de economische waarde van deze toestanden. Vinden deze wel buitengewoon simplistische verhoudingen nog wel voldoende grond en reden van bestaan in de behoeften onzer moderne maatschappij? Bieden al deze dwergbedrijfjes van keuterboeren en melkslijters voldoende waarborgen voor een technisch en economisch doeltreffende organisatie en werking der voedselvoorziening?

Zeker, er zijn ongetwijfeld voordeelen, zelfs groote voordeelen verbonden aan dezen gedecentraliseerden opzet. Het valt o.a. niet te ontkennen, dat een gelijkmatige, niet door schokken of ernstige onderbrekingen gestoorde, werking der melklevering verzekerd wordt door het feit, dat honderden kleinere boeren daaraan bijdragen.

Stoornissen in een of meer bedrijven, ziekte en sterfte onder het vee, ziekte of sterven van den eigenaar en andere gebeurtenissen, worden bij deze verhoudingen bijna onopgemerkt, welhaast automatisch verholpen, zoolang een nadeelig verschijnsel, zooals ziekte en sterfte onder het vee, niet een grooter gebied betreft. En stellig ook wordt uitbreiding van ziekte op deze wijze minder gemakkelijk.

Maar daarmee is dan ook nagenoeg alles opgesomd, dat pleit voor de ongerepte handhaving van den bestaanden toestand. Een ander voordeel, dat men eveneens zou kunnen veronderstellen daarmee samen te hangen, bestaat niet. Zoo is b.v. de vraag gewettigd, of de verbreiding van infectieziekten, met name tuberculose en febris typhoidea, niet zeer bemoeijlikt wordt door deze voorziening op de basis van het kleinbedrijf; voorzover immers de melk naar de groote melkinrichtingen wordt gebracht en daar onder grootere, ja heel groote hoeveelheden wordt gemengd, gaat het voordeel van de streng doorgevoerde differentiatie geheel verloren. Niettemin kan, zooals boven werd aangetoond, aan den bestaanden gedecentraliseerden toestand een zekere doelmatigheid niet worden ontzegd. Het zijn vooral eenige onderdeelen van de bemoeiingen op het gebied der voedselvoorziening waarvoor deze waardeering geldt en wel tot op zekere hoogte de productie en bovenal de distributie in engeren zin, d.w.z. de acte van het brengen van het product tot den consument. Doelmatigheid, voortdurende aanpassing aan veranderde, c.q. zich gestadig veranderende, omstandigheden — zooals stadsuitbreiding etc — is allea verzekerd bij een, met pijnlijke zorgvuldigheid doorgevoerde, verdeling van arbeid te dezen opzichte in de groote steden, waarbij uit den aard der zaak eenige economische desiderata niet uit het oog verloren mogen worden. Daarentegen is centralisatie tot op zekere hoogte uit een technisch-

## APOTHEKERSPAPIEREN

*Levering uit voorraad van alle soorten*

*Poederpapier, Flesschenkapjes, Inwikkelvloei, enz. — Offerte op Aanvraag*

J. B. BOS - Kerkstraat 4 - A'dam Anno 1882 Tel. C 32 - Eigen Drukkerij & Boekbinderij

economisch oogpunt gewenscht bij die bewerking van het product, die aan de eigenlijke distributie voorafgaat en gericht is op de vernietiging van schade-verwekkende invloeden.

Alleen een ingrijpende analyse van de voedselvoorziening en haar huidige behoeften, de voorwaarden waaraan zij heeft te voldoen, de evolutie, waaraan zij onderhevig was en is, en die haar karakter in menig opzicht bepaalt, vermag een inzicht te geven in de richtingen, waarlangs deze voorziening zich heeft te bewegen om aan redelijke eischen van doelmatigheid te kunnen voldoen. Daarbij zal blijken, dat eenvormigheid en „schablone” hier ten eenenmale misplaatst zijn, dat locale invloeden en omstandigheden in hooge mate het wezen en karakter van een bepaalde, plaatselijke, voorziening beheerschen en dat ook deze locale aangelegenheden, naar gelang van het tijdstip van beschouwing, onderhevig zijn aan voortdurende beweging en verandering, die een verschillende oplossing voor verschillende tijdperken kunnen vragen. Zóó sterk staat de waarheid dezer stelling mij voor oogen, dat ik zou willen beweren, dat de kwestie van beginsel hier zelfs van ondergeschikt belang is. Zooals wellicht, wanneer men de zaken breed beziet, ten opzichte van meerdere groote problemen geldt. Men smaalt dikwijls op het beginsel der Oude Manchester-school, ridiculiseert het: „laisser faire, laisser aller”, maar vergeet daarbij maar al te vaak, dat 70 jaar geleden dit beginsel de verlossende belofte bracht, waarnaar het bedrijfsleven smachtte.

De ontwikkeling staat niet stil, het maatschappelijk raderwerk is in stage beweging en iedere tijd vraagt de vervulling van nieuwe behoeften en aanpassing aan evolueerende omstandigheden. De practijk heeft maling aan het het beginsel, maar het beginsel kan allermint maling hebben aan de practijk.

Wanneer men aldus de melkvoorziening der groote steden beschouwt, wordt men getroffen door twee sprekende misstanden, n.l. in het sluitstuk der distributie, en in dat gedeelte van het proces, dat de melk doorloopt van de bron naar den tusschenhandel. Waarom, zoo vraagt men zich af, ontbreken in de laatste genoemde acte de hooger georganiseerde economische vormen? Een enkele melkinrichting is in het bezit van één of meer ontvangstations

en vóórpasteuriseerinrichtingen. Maar het is een raadsel, waarom de boeren zich tot nu toe nog niet hebben aaneengesloten met het doel allerwege in het melkgebied centra te scheppen, die een technisch-economische vervulling van dit onderdeel van de verzorging der stedelijke bevolking verzekeren. Langs deze lijn zou ook een verbetering van het gehalte der melk, ook in hygiënischen zin, kunnen worden nagestreefd.

In laatste instantie moeten de hier geconstateerde hiaten en misstanden teruggevoerd worden tot de afwezigheid van het besef bij de overheid, dat met vaak onbeduidende middelen, o.a. het geven van leiding en moreelen steun, veel kan worden bereikt. Wanneer de handel met het buitenland op het spel stond, kwam de belangstelling en de medewerking van de regeering veel gemakkelijker voor den dag. Waarom zou de eigen bevolking in mindere mate moeten profiteren van de resultaten van dit inzicht?

Velen zijn huiverig de staatsbemoeiing uit te breiden. Ook ik zie geen heil in noodlooze overheidszorg, acht in hoofdzaak de voedselvoorziening in de handen van het particulier initiatief op haar plaats. Doch men mag niet blind zijn voor de gevaren van anarchie op dit zoo belangrijke gebied, dat in de wisseling der tijden een gansch ander aspect, een veranderde sociaal-economische constellatie is gaan vertoonen. En men mag evenmin de oogen sluiten voor de betekenis, die een regelend, leidend, steunend en, zoo noodig, aanvullend optreden der overheid kan hebben.

Het verzet tegen heel veel wettelijke maatregelen, in vroeger tijden begrijpelijk, heeft plaats gemaakt voor waardeering, nadat de gewijzigde maatschappelijke behoeften zich burgerrecht verschaft hebben in het sociaal bewustzijn. En na ons komende geslachten zullen even vreemd opzien tegen onze houding en opvattingen als wij het meermalen doen tegen die van onze voorvaderen, vergetende, dat de mensch van alle tijden vergroeid was met de zeer bijzondere omstandigheden en begrippen van zijn eigen tijd. Wanneer wij deze waarheid voorbijzien, blijven heel veel misstanden, die inhaerent zijn aan het huidige „stelsel” der melkvoorziening, zeer tot nadeel van de bevolking voortbestaan.



## GEDIPLOMEERDE BAKERS

(Kraamverzorgsters)

door

Dr C. J. BRENKMAN

Onder dit hoofd had ik het artikel geschreven dat hieronder volgt toen in den gemeenteraad van Amsterdam de kwestie der opleiding van kraamverzorgsters ter sprake kwam. MEVR. TILANUS interpelleerende, besprak het feit dat zoovele kraamvrouwen door niet behoorlijk opgeleide krachten worden geholpen; WETHOUDER Dr. VOS antwoordde dat hij wilde meewerken om deze urgente zaak in het goede spoor te brengen.

Voorts werd mij toegezonden :,*Wettelijke regeling*, orgaan van de vereeniging tot verkrijging van de wettelijke regeling van opleiding der examens voor ziekenverpleegsters en verplegers” — een langademige titel, die m.i. nog moest worden uitgebreid met :..... „en kraamverzorgsters”. Uit de inleiding van de hand van Dr. E. J. ABRAHAMS, neem ik, mede als inleiding van wat hier volgt, met instemming over :

De opleiding van verplegend personeel is eene zaak die onze belangstelling waard is. Voor de zieke, die aan de zorgen van dit personeel wordt toevertrouwd en die de capaciteiten niet kan beoordeelen, moet vast staan, dat hij zich met gerustheid kan overgeven.

En nu dan, ter zake !

Eenigen tijd geleden kreeg ik bezoek van een paar dames, uitmakende het bestuur van de onderlinge vereeniging van kraamverzorgsters. 1). We hebben samen gepraat en ik heb haar beloofd van dit gesprek eens iets te vertellen in dit Tijdschrift.

Hier en daar bestaat de gelegenheid om tot kraamverzorgster (K.V.) te worden opgeleid, ik bedoel tot eene K.V. die door een arts of vroedvrouw met een gerust hart bij de kraamvrouw kan toegelaten worden. Te Amsterdam bestaat deze gelegenheid bij de vereeniging A'damsche kraamverzorging (A.K.V.), die in nauw contact met de Rijkskweekschool voor Vroedvrouwen en met den Gemeentelijken Geneeskuündigen Dienst werkt. In den Haag wordt ook officieel opgeleid, er zijn in Haarlem, misschien in Rotterdam en nog hier en daar elders meer of minder behoorlijke opleidingen; bekend

1) Deze vereeniging bestaat, althans voor het grootste deel, uit onbevoegden.

is ten slotte nog de opleiding in Friesland, uitgaande van het Groene Kruis..... maar een eenvormige opleiding bestaat in ons land niet. Nu zou dat misschien nog niet zoo erg zijn als er naast de zoo juist gegeven lijst van opleidingsinrichtingen, — die heel best niet volledig zijn kan — nog niet een groot aantal gelegenheden waren om „ook een opleiding” tot K.V. te verkrijgen, een opleiding die echter niet door den beugel kan. En hierover wil ik het juist voornamelijk hebben.

In den goeden ouden tijd, die nog niet zoo ver achter ons ligt, besprak iedere a.s. kraamvrouw te harer tijd een baker; deze vrouwelijke hulpkracht had geen andere opleiding gehad dan de praktijk; goede burenplicht bracht mee dat in den tijd der baring de kraamvrouw werd bijgestaan door de naaste buurvrouwen. Zij die aanleg voor het vak hadden, ook wel zij die er een bestaan in zagen, gaven zich als baker uit, gingen uit bakeren, nadat zij eenige malen als buur haar hulp hadden verleend. Deze bakkers hadden meestal en hebben nog steeds veel aftrek, omdat er niet veel concurrentie op dit gebied is, althans ten plattelande. In kleinere plaatsen en op dorpen kan dat bakerstelsel zeker in goede banen geleid worden door een nauwlettenden arts. Maar het is toch wel overbekend dat er ook heel wat bakkers zijn wien de noodige kennis van haar vak niet is bij te brengen. Het Groene Kruis in Friesland en elders deed veel goeds door bakkers op te leiden en ik heb met de aldus gediplomeerden bij kraamvrouwen wel de meest prettige ervaringen opgedaan. De moeder- en bakercursussen die thans gegeven worden werken in de goede richting; uit de cursisten melden zich af en toe leerlingen aan die tot baker, of als ge liever wilt: kraamverzorgster worden opgeleid.

Echter hier en daar — en Amsterdam staat hierin aan de spits — hebben enkele vroedvrouwen zich als autoriteiten op dit gebied opgeworpen. Zij geven aan meisjes, onder schoonschijnende beloften, gelegenheid om theoretisch en praktisch opgeleid te worden tot K.V. Aan deze opleiding verbinden zij een „diploma” — nietwaar, een diploma kan iedereen uitgeven zoolang het nog niet van staatswege is beschermd. De A. K.V. geeft een diploma, het Groene Kruis doet dit en zoo nog andere goed werkende vereeni-

gingen ; waarom zouden zij, die vroedvrouwen, dit ook niet doen ? Het gaat dan gewoonlijk aldus : in den tijd van enkele weken moeten de candidaten een boekje doorwerken, soms doen zij dat als externe, soms zelfs als interne leerlingen van Mevrouw Zus of Zoo. Ze worden naar de kraamvrouwen meegenomen, nadat Mevrouw ze eerst in een behoorlijk kleed heeft gestoken, dat wonderveel op een verpleegsters-costuum gelijk. De kraamvrouw die behoorlijke hulp niet krijgen kon — dikwijls zijn dat natuurlijk onervaren vrouwen — was heel verheugd toen haar vroedvrouw haar gezegd had „wel iemand voor haar te weten”. De nieuwbakken „zuster” moet dan, met haar leermeesteresse er op uit en wordt ingekwartierd bij de jonge moeder. Dit is de practische opleiding. Inderdaad, van praktijk is deze opleiding niet gespeend ! De leerlingen betalen Mevrouw gewoonlijk 40 gulden of daaromtrent, Mevrouw weet goede adressen voor de leverantie van kleeren en benodigdheden voor de tasch, ook de verkoop van het „boek” legt Mevrouw geen windeieren en zij is ook meer of min geïnteresseerd bij wat de leerlinge verdient. Het slot van deze opleiding is dan een „diploma” en..... nog iets, n.l. een ongelukkige vrouw, die denkt dat ze wat is, *doch die niets is*. Ze kozen deze opleiding omdat ze zooveel korter was en dus zooveel goedkooper dan die van de A.K.V. ; ze waren winkeljuffrouw of zoo iets en wilden hoogerop, of ook wel voelden zooveel voor kinderen. Haar lessen konden ze alleen 's avonds nemen ; de A.K.V. doet het zoo niet, omdat het niet kàn, maar wat weten winkelmisjes van dergelijke zaken. Zoo vliegen ze in de netten van de lokkende vogelaarsters en als ze dan geplukt zijn — nu ja daarover maakt zich „Mevrouw” niet druk.

Van deze misjes, die zich „kraamverpleegster” noemen, bezit Amsterdam er heel wat, en dagelijks worden er nog afgeleverd. De dames

die mij dit alles vertelden, en nog veel meer, zien in dat het zóó niet langer mag doorgaan ; zij hunkeren naar bescherming van het Kraamverzorgstersdiploma en ik wilde niet nalaten haar in dit deel van haar streven te helpen. Naar mijn overtuiging zal dat streven zich hiertoe moeten beperken, waarvan ik tot mijn spijt niet geheel zeker ben. Het is mij niet mogelijk hier uiteen te zetten onder welke omstandigheden vele van die verkeerd opgeleiden leven: rooskleurige zijn die niet.

Het is er echter boven alles om te doen te wijzen op het groote gevaar dat dagelijks geloopt wordt door honderden kraamvrouwen die zich aan deze onkundigen toevertrouwen. *Het publiek weet er niets van* en denkt maar dat ieder die met een sluier of verpleegsterspak zich aanmeldt ook de noodige kunde bezit — zij zijn toch „zusters” en nog wel „gediplomeerd” en vaak aanbevolen door vroedvrouwen ! Ook kan men zich op deze wijze tegen lagen prijs van de hulp van een „zuster” verzekeren en dat staat gekleed.

*Het is de onafwijsbare plicht der regeering om hier in te grijpen.* Het publiek moet ook te dezer zake tegen zichzelf worden beschermd. Het is te gek dat Jantje, Pietje en Klaasje maar mogen decreteren dat „zuster” die en „zuster” gene het vak der kraamverzorging naar behooren verstaan en dat zij dan maar op de kraamvrouwen worden losgelaten. Ik wil nog niet eens spreken over al het leed dat deze ongare opleidingen brengen over de juffrouwen zelve ; hoewel ik thans weet dat dit leed niet te onderschatten is.

Het algemeene welzijn van ons volk brengt mee dat ten spoedigste een uniforme regeling getroffen worde ten opzichte van de opleiding van bakkers of — zoo men dit hollandsche woord blijft verguizen — kraamverzorgsters en nooit kan een parool van bezuiniging reden zijn dat dit niet gebeurt. Elke dag die langer wordt ge-



**Stark's**  
Sandmiddelen

*De fabriek van Stark is de oudste op haar gebied en bestaat reeds sedert 1830. Het is grotendeels aan hare veeljarige routine te danken, dat zij in staat is zulke voortreffelijke producten te maken. De vulling van doosjes, tuben en flesschen gaat geheel langs mechanischen weg en letterlijk niets van hare, bij uitstek hygiënische preparaten wordt met menschenhanden aangeraakt.*



talmd om deze zaak aan te pakken is onverantwoord<sup>1)</sup>. De regeling zal niet zoo moeilijk te maken zijn, de zaak zelve is uiterst eenvoudig en er zijn reeds goede voorbeelden; ook gaan hiermee weinig of geen kosten gepaard. Dat ten slotte degenen die zich voor K.V. uitgeven en reeds langeren tijd praktijkervaring hebben opgedaan bij eene regeling niet mogen worden genegeerd, doch integendeel in de gelegenheid gesteld moeten worden een verlicht examen af te leggen lijkt mij alleen noodig hier nog aan toe te voegen om de ernstige werksters onder de self-made bakkers niet al te zeer te verontrusten.

1) Zie verder onderstaand congresverslag.

Amsterdam, November 1922.

## CONGRES KRAAMVERZORGING

Door het „Genootschap tot Ondersteuning van Behoeftige Ned. Isr. Kraamvrouwen te Amsterdam” werd ter gelegenheid van zijn 100-jarig bestaan 20 Dec. j.l. onder voorzitterschap van Dr. I. H. J. Vos een *Conferentie* gehouden waar besproken werd *de verzorging van de on- en minvermogende kraamvrouw en haar kind*. Mr. H. LOUIS ISRAËLS besprak de economische zijde van het vraagstuk, prof. KOUWER de medische. Het leek mij gewenscht van diens betoog een kort verslag te geven en van de meest belangrijke punten die bij het zeer geanimeerde debat aan de orde kwamen. De rede van Mr. Israëls kon ik tot mijn spijt niet bijwonen.

Het welzijn van een kraamvrouw hangt in de eerste plaats af, — aldus de inleider — van de hoedanigheid der *verloskundige hulp*. Deze is in ons land bijna overal goed, dank zij de goede opleiding der artsen maar vooral door de uitnemende opleiding van de vroedvrouwen die hier volle drie jaar duurt. Spreker zou wenschen dat onze vroedvrouwen *alle* ongecompliceerde baringen zouden verrichten; de vroedvrouw heeft ook tijd voor dit werk beschikbaar, de arts is maar al te dikwijls gehaast en neemt vaak noodeloos zijn toevlucht tot kunstmiddelen om de baring te beëindigen.

De *verpleging* der kraamvrouwen echter is lang niet wat zij wezen moet. In de kliniek is deze uitnemend maar spreker kan beoordeelen

hoe de verpleging is ten huize van  $\pm$  2000 kraamvrouwen per jaar in Utrecht. De verlossingen bij deze vrouwen worden verricht door semi-artsen onder toezicht van een arts; „verpleging” is er eigenlijk niet en bestaat uit niet veel meer dan wat hulp van een familielid of buur. Van dit gemis aan verpleging zag de hoogleeraar tegen zijn verwachting *nooit* kwade gevolgen, noch infectie, noch nabloeding, noch slecht zoogvermogen. Daarom is hij overtuigd dat niet de volksgezondheid voorziening in die verpleging eischt, maar de barmhartigheid eischt dit wel degelijk.

Kraamvrouwverpleging door de ambulante- of wijkkraamverpleegster of -verzorgster is steeds onvolledig; slechts een permanente verpleging heeft zin. Daarom moeten we terug tot de *baker*, die gelukkig reeds weer hier en daar in eere komt. De bakeropleiding te Harlingen vanwege het Groene Kruis heeft sprekers volle sympathie. Naar zijn overtuiging kan iedere verstandige vrouw, die van goeden wille is, dit eenvoudige vak leeren. Hoofdzaak is dat de baker, die hij zich als een ietwat bejaarde burgerjuffrouw denkt, naast de kraamvrouw en het kind ook het gezin verzorgt en tijdelijk *inwonend* is; de kraamvrouw *moet* de psychische rust hebben dat ze weet dat haar huishouding ook goed marcheert.

Het Groene Kruis kweekt door deze instelling gemeenschapszin; beter dan gemeentelijk werk acht de inleider in dezen dit coöperatieve streven. Steun van de overheid kan men niet missen. Het zal zóó misschien niet snel gaan, maar, waar het hier een zaak van humaniteit is, is dit ook niet strikt noodig.

Geheel anders is het met de *verpleging van de zuigeling*; de gemeenschap is verplicht daarvoor te zorgen, ook ten huize der kinderen. Daarvoor zullen noodig zijn wijkkraamverpleegsters, misschien kunnen hier en daar vroedvrouwen dit werk verrichten.

Het debat werd geopend door den hoofdinspecteur Dr. OOSTERBAAN, die een goede kraamverpleging wél zaak der volksgezondheid acht. Te Utrecht hebben de vrouwen die poliklinische verloskundige hulp krijgen geen gelegenheid om ziek te worden; bij de minste afwijkingen worden ze opgenomen. Elders, vooral

ook op het platteland, komen wel degelijk na-deelige gevolgen van slechte kraamverpleging voor. Toch betoogt ook de debater dat hij in de toekomst heil ziet in de goede, niet te oude, baker.

De directeur van de A'damsche Vroedvr. school, dr. MEURER, ziet wel heil in de wijkkraam verzorging, welke meening steunt op zijn ervaring. Hij deelt mede dat er een Bond is opgericht, die zich in verbinding zal stellen met het Groene Kruis, met het doel te komen tot een goede opleiding van kraamverzorgsters.

Zr. VAN HULST, van het Groene Kruis, geeft een uiteenzetting van de Harlingsche bakeropleiding. Tot slot van haar betoog poneert zij verschillende stellingen, o.a. „het is der menschen recht en plicht thuis geboren te worden en te sterven, het is dus plicht de verpleging thuis goed te maken.”

De voorzitter van de Ned. Mij. t. bev. d. Geneeskunde, dr. ALDERSHOFF betoogt eerst dat ook naar zijn overtuiging de normale bevalling door de vroedvrouw dient verricht te worden, die geen geneeskundige hulpkracht, maar een geneeskundige kracht is. Wat de verpleging betreft moeten we ook eens denken aan de middenstand. Ook voor deze menschen moet de hulp voor de vrouw en voor het gezin in één hand zijn. Het vraagstuk is werkelijk niet zoo moeilijk; de oplossing eischt een warm hart en practischen zin. De eischen die aan de verzorgsters of bakkers moeten gesteld worden behooren zoo gering mogelijk te zijn.

Dr. HEYERMANS, directeur van den Gem. Geneesk. Dienst van A'dam, is door de inleider niet voldaan en ziet geen goed afgebakende lijn in diens betoog. Er mag geen tegenstelling komen tusschen overheids- en particuliere zorg, maar er moet gezocht worden naar samenwerking. De genoemde tegenstelling bestaat niet; alles is een kwestie van liefde en toewijding, waarvan de schitterende voorbeelden zoowel bij de eene als bij de andere organisatievorm worden gevonden. Het publiek wil van de baker niets meer weten; als men haar in eere wil herstellen dan moeten wij weten aan welke eischen zij zal moeten voldoen. De goed opgeleide bakkers zullen de huisverzorging in vele gezinnen niet op zich willen nemen; combineeren van deze hulp is heel goed, maar *kan* niet altijd. Men zal

dus verschillende regelingen moeten treffen.

Nog enkele dames en heeren voerden het woord, prof. KOUWER repliceerde en de voorzitter, Dr. VOS, vatte het gesprokene in 't kort samen, dankte Prof. Kouwer en sprak als zijn overtuiging uit dat het succes van dit congres verzekerd was.

B.

---

## KINDERSTUDIE EN SCHOOLHYGIËNE

---

### De beoordeeling der Persoonlijkheid

In opvoedingsgestichten, scholen voor achterlijken en bureaux voor beroepskeuze, wordt in den regel veel waarde gehecht aan het invullen door den onderwijzer van een individueel register voor de pupillen. En terecht, mits men steeds weer bedenke, dat de gegeven beoordeeling nooit geheel kan overeenstemmen met de beoordeeling die wij zelf of een ander in gelijke omstandigheden van het kind zouden geven. De waarneming van een gegeven werkelijkheid hangt af van de, van oogenblik tot oogenblik veranderende, neiging tot bewustwording van onze latente gedachtencomplexen, is dus altijd subjectief: „Wenn zwei dasselbe sehen, so sehen sie nicht dasselbe”. Bekend is het verhaal van de twee bioscoopbezoekers, die bij het zien van een oogst-film plotseling een sterke hooilucht waarnamen. Later bleek de aanleiding hiervan, het binnenkomen van een dame, wier parfum in het geheel geen overeenkomst had met hooilucht! Behalve die met den tijd varierende neiging tot bewustwording der gedachtencomplexen, vertoonen de menschen onderling blijvende verschillen, de een ziet alles door een rose bril, de ander ziet in een klein vergriep de voorspelling van een leven van misdad. Ook werkt de persoonlijkheid van den waarnemer op het gedrag van den waargenome: „wilt gij, dat ik ween, begin dan zelf te weenen”, zei reeds HORATIUS.

LANGELÜDDEKE heeft nu de verdienste gehad, proefondervindelijk de betrekkelijke waarde der persoonsbeschrijving aan te toonen, door de schema's van Heymans en Wiersma voor een zelfde persoon door verschillende waarnemers

te laten invullen. Hij kreeg dan bij voorbeeld als antwoord ten opzichte van X:

|                                         |                                  |
|-----------------------------------------|----------------------------------|
| A zegt :                                | B zegt :                         |
| beslist optreden                        | weifelend optreden               |
| verdraagzaam                            | onverdraagzaam                   |
| konstante neigingen                     | wisselende neigingen             |
| goed menschenkennen                     | slecht menschenkennen            |
| vrij van maatschappelijke vooroordeelen | hecht aan het conventioneele     |
| zelfstandig                             | zonder kritiek                   |
| zakelijk in zijn mededeelingen          | omslachtig in zijn mededeelingen |

En dat alles over dezelfde persoon!

Voor een deel ligt dit aan de schemata, die over het algemeen slechts antithesen bevatten: „slordig of netjes”, „handig of onhandig” enz. terwijl de werkelijkheid altijd tusschen die uitersten ligt, maar ongetwijfeld speelt de aard van den invuller de hoofdrol. L. zag bij de vragen, die betrekking hebben op het verstand minder onderlinge verschillen dan bij de „gevoelsvragen”. Maar dat is juist het ongeluk, over het verstand kunnen wij door de voordeelingen in de schoolvakken en onze tests zelf wel een oordeel vormen; de individueele registers dienen in hoofdzaak om ons in te lichten omtrent het karakter. Uit de door L. gegeven voorbeelden blijkt duidelijk de beteekenis van sympathieën en antipathieën, zoodat de waarde der persoonsbeschrijvingen zou toenemen, indien dezelfde schemata door meer dan één onderwijzer werd ingevuld. En bovendien moet zooveel mogelijk door uitvoerig beschreven voorbeelden het oordeel worden toegelicht.

D. HERDERSCHÊE.

*Zeitschrift f. angewandte Psychologie 1922 S. 397*

## MOEDER EN ZUIGELING

*Hooge Zuigelingensterfte staat nooit op zichzelf; deze staat steeds in nauw verband met onwetendheid der moeder en slechte verzorging van het kind. Verbreiding van kennis is dus het voornaamste middel om de hooge zuigelingensterfte te bestrijden.*  
(Health).

### Zuigelingenverzorging te Mannheim

Uit een beschrijving gegeven door Dr. S. FELSANTHAL blijkt dat men te Mannheim zijn kracht gezocht heeft in *zoogpremies*. Tot voor kort werden zelfs alleen kinderen die gezoogd werden op de consultatiebureaux toegelaten; dat standpunt werd verlaten, doch ook thans komen de moeders zelden met de kunstmatig gevoede kinderen op het C. B. Alle moeders die regelmatig d.i. ongeveer om de 14 dagen hun kind laten onderzoeken krijgen premie's. De bureaux zijn lang niet alle dagen geopend, meestal maar 2 maal per week, een fout die wij in zeer veel Deutsche steden terugvinden. Zuigelingenverzorgers maken huisbezoek om te controleeren of de kinderen borstvoeding krijgen en om de moeders voedselbereiding te leeren. Het dure premiestelsel dat gedurende steeds langer perioden werd toegepast lijkt mij een mislukking: het bleek n.l. dat herhaaldelijk de kinderen gespeend werden direct als de premieuitkeering eindigde en dan dus zeer abrupt, hetgeen voedingsstoornissen na zich sleepte. Het stelsel had dus niet tot gevolg dat de moeders meer begrip kregen van goede zuigelingenverzorging en als dat niet het geval is mag men toch veilig aannemen dat het stelsel niet aan de verwachting voldoet. De schrijver vertelt dan ook dat men te Mannheim geen groote verwachtingen koestert in deze richting, doch door in de hoogste klassen der meisjesscholen lessen te geven in kinderverzorging hoopt hij dat de moeders der toekomst beter onderlegd zullen zijn. Dit onderwijs

**LICHTBEELDENDIENST D. VAN KREVELD**  
Heerengracht 154 **AMSTERDAM**, Telefoon C. 5847.  
Projectiefoestellen voor Lantaarnplaat- en Filmvertooningen.  
Lichtbeelden en Bioscoopfilm naar elk gegeven.  
**VERHUURINRICHTING.** **AMSTERDAM**

wordt door vrouwelijke artsen gegeven, een cursus duurt telkens 6 weken, hetgeen wel te kort zal zijn om iets blijvends te bereiken. (*Zeitsch. f. Säugl. u. Kleink. schutz. Mei 1922.*)

B.

Uit één der plattelands-districten van Amsterdam wordt bericht:

„Was het Consultatiebureau in den beginne als het ware een proefneming, thans heeft het er voorgoed burgerrecht verkregen. De moeders uit Nieuwendam zijn de trouwste bezoekers geworden, een moeder die eenmaal komt blijft komen”.

Voor de levensvatbaarheid van C.B.'s ten plattelande pleit een dergelijke uitspraak, gebaseerd op ruime ondervinding.

Aan ditzelfde C.B. heeft de arts ervaring opgedaan van de voor- en nadeelen van het verbinden van de vroedvrouw aan de zuigelingenorg. Hij is van meening dat:

„Zij die de vroedvrouw geen plaats meenen te moeten toebedeelen in de Zuigelingenorg ongelijk hebben. Natuurlijk zal niet iedere vroedvrouw voor deze taak geschikt zijn, maar ook is niet iedere zuster daar op haar plaats. Een vroedvrouw heeft 2 nadeelen;

- 1e. is ze niet altijd beschikbaar,
- 2e. heeft ze niet zoo'n goede kijk op het al of niet ziek zijn van kinderen. Daarom is het niet juist om door een vroedvrouw zuigelingenbureau te doen houden, waarbij zij alleen voor in haar oog moeilijke gevallen, de raad van den dokter inroept. De dokter moet altijd blijven het centrum van de zuigelingenorg, ook ten plattelande”.

B.

## STATISTIEK

### Gezondheidstoestand in Duitschland

naar aanleiding van het „Denkschrift über die gesundheitlichen Verhältnisse des Deutschen Volkes” 1920/21.

#### Ziekten

Na den oorlog en gedurende dezen zijn op verschillende plaatsen de besmettelijke ziekten sterk toegenomen en vooral de *tuberculose* heeft groote offers geëischt hoewel de laatste twee jaren het sterftecijfer aan deze ziekte aanmerkelijk is gedaald. Toch moet men niet te optimistisch zijn en liever afwachten of deze daling stand houdt; velen vreezen dat de *tuberculose* door de slechte voeding en andere invloeden (woningnood) meer en meer de jonge kinderen aantast. Zoo hadden van de poliklinische patiënten van het Kinderziekenhuis van de stad Berlijn in 1912/13 1% floride *tuberculose*, in 1913/14 0.5%; in 1919/20 was dit cijfer 2.8% en in 1920/21 4.8%.

Terecht wijst het rapport er op dat pas na jaren de invloed van den oorlogstoestand op het jonge geslacht zal kunnen worden nagegaan;

in dat verband wordt dankbaar gewag gemaakt van de daadwerkelijke steun door verschillende naburige landen verleend, door Duitsche kinderen gastvrij in den familiekring op te nemen.

Wat de *geslachtsziekten* betreft kan worden vermeld dat een groote toename, waarvoor gevreesd werd, statistisch niet kan worden aangetoond.

#### Gezondheidstoestand van zuigelingen en kinderen.

Dit hoofdstuk begint met jammerklachten over het steeds slechter worden der normale voeding. Door de enorme duurte en door de ondervoeding konden de zoogende moeders veelal slechts minderwaardig zog produceeren en het lijkt wel juist dat deze opmerkingen veel waars bevatten, gezien de minderwaardigheid van de koemelk. De koeien konden de laatste jaren natuurlijk geen behoorlijk krachtvoer krijgen (duurte en schaarschte der veevoeder). Toch maakt dat hoofdstuk een slappe indruk, het is niet gedocumenteerd en de schrijver geeft dat dan ook wel toe. *Rachitis* en andere ziekten zouden veel meer voorkomen dan vroeger en niet alleen de zuigelingen maar ook de kleuters zouden zeer ernstig te lijden hebben. Maar bij hen blijft het niet; ook de schoolkinderen vertoonen de gevolgen der ondervoeding en het is treffend dat de onderzoekingen aantoonen dat juist de *kinderen van den middenstand* het zwaar te verantwoorden hebben. Hier en daar zijn cijfers verzameld en we vinden daa ook dat lengte en gewicht der schoolkinderen minder bedragen dan normaal; des te meer is het te betreuren dat al dat materiaal statistisch van zoo weinig waarde is en dat er alleen globale cijfers worden genoemd. Laat ik hier alleen als treffend vermelden dat b.v. in Karlsruhe 40% der schoolkinderen „*sehr unterernährt*” zijn. „*Spätrachitis*” komt ook zeer veel onder schoolkinderen voor; in Striegau worden zelfs 90 tot 95% van alle 6-jarigen daaraan lijdende bevonden.

De *melkproductie van de veestapel* verminderde ten eerste doordat deze laatste sedert 1912 met 1/7 is afgenomen, maar nog veel meer omaat de productie per koe thans ongeveer de helft bedraagt van vroeger. Het jaarcijfer bedroeg vóór den oorlog gemiddeld 22 milliard liter, in 1920 slechts ruim 9 milliard.

Nog drie korte hoofdstukken volgen ; één over de *woningnood*, die uit der aard ernstige gevolgen na zich sleept ; één over de gevaren die van uit *Oost-Europa* Duitschland bedreigen en één over het *gebrek aan kleding*. Duizenden kinderen hebben geen behoorlijke bedekking en het is van belang eenige cijfers te geven betrekking hebbende op Hamburg.

| Op 100 schoolkinderen hadden | v/h Gymnasium | v/d Ober-RealSchule | v/d Volksschule |
|------------------------------|---------------|---------------------|-----------------|
| bruikbare schoenen           | 88            | 60                  | 58              |
| een tweede paar              | 78            | 50                  | 30              |
| een bruikbaar hemd           | 93            | 80                  | 69              |
| een reserve hemd             | 86            | 57                  | 44              |
| bruikbare kousen             | 86            | 53                  | 62              |
| reserve kousen               | 84            | 33                  | 27              |
| een zakdoek                  | 95            | 81                  | 53              |
| meer zakdoeken               | 95            | 74                  | 38              |

Het is voor de sociaal-geneeskundigen belangwekkend dit geschriftje te lezen ; *het is een klacht, een aanklacht tevens.*

B.

### Pokken en Vaccinatie

De hoofdinspecteur Dr. TERBURGH deelt in zijn jaarverslag over 1921 mee dat het totaal aantal personen die om gezondheidsredenen vrijgesteld zijn van de vaccinatie op 31 December 1921, 472 bedroeg, wanneer men geen rekening houdt met de onder deze kinderen in dat tijdvak opgetreden sterfgevallen. De verslaggever gaat dan voort : „Dit aantal niet-gevaccineerden is zoo onbelangrijk dat hiervan weinig gevaar voor de Volksgezondheid te duchten valt.” Een eenigszins belangrijke uitbreiding van het aantal ongevaccineerden zou de hoofdinspecteur dus wel gevaarlijk achten, een meening die straks van belang kan blijken als de nieuwe epidemiewet in behandeling komt.

Het aantal verrichte inenting en herinentingen tegen pokken bedroeg in 1921 : 140.949, verdeeld over de leeftijdsgroepen als volgt :

| beneden het jaar | 1—3 jaar | 3—6 jaar | 6—12 jaar | boven 12 jaar | leeftijd onbek. |
|------------------|----------|----------|-----------|---------------|-----------------|
| 8278             | 50477    | 68712    | 10987     | 2417          | 78              |

Het is natuurlijk niet juist dat hier alle herinentingen geteld zijn, het kan niet anders teekenen dan die revaccinaties waarvan een officieele verklaring is afgelegd, dus meestal betreffende kinderen die 1 jaar eerder zonder succes werden ingeënt. Van meer belang lijkt mij intussen dat de verdeling van leeftijdsgroepen niet bevredigen kan. We lezen er niet uit of er veel ouders zijn die hun kinderen laten inenten *zonder* dat het a.s. schoolbezoek hen daartoe dwingt. Onder de 1—3 jarigen vallen reeds de kinderen die straks de voorbereidende school gaan bezoeken, onder de 6—12 jarigen zijn waarschijnlijk de 6 jarigen de grootste rubriek, bestaande uit kinderen die dan nog niet naar school zijn geweest. Ook is het zeer gewenscht inenting en herinentingen uit elkaar te houden. Misschien wil de hoofdinspecteur een volgend jaar deze opmerkingen eens overwegen.

B.

### NIEUWS UIT DE VEREENIGINGEN

*Het volgende adres werd verzonden :*

Aan  
de Leden der Tweede Kamer  
der Staten-Generaal.

De Nederlandsche Vereeniging van Schoolartsen acht elke vermindering van hygiënische omstandigheden in de Lagere School te verwerpen ;

verzet zich tegen elke wetswijziging, die deze vermindering mogelijk maakt en verzoekt de Leden der Tweede Kamer te waken, dat geen wetswijziging het toelaten van meer leerlingen in de bestaande lokalen mogelijk maakt, dan waarvoor zij volgens het bij den bouw van kracht zijnde bouwbesluit bestemd waren.

R. C. SUYLING, Utrecht *Voorzitter.*  
Dr. M. VAN DER HOEVE, *Secretaris.*

Amersfoort, 18 December 1922.

## Ned. Ver. van Schoolartsen.

*Verlag Wintervergadering.*

De wintervergadering onzer Vereeniging behoort al weer tot het verleden. 16 December gingen verscheidene onzer leden op naar Amsterdam om te genieten van de sociaalmedische smulpartij der G.G.V., maar Zondag 17 December was het de eigenlijke dag van onze vereeniging en kwamen 22 leden samen in de holte der marmereen zaal van „American”, later wat aangevuld door de G.G.V.

De lust tot actieve deelname in de huishoudelijke vergadering bleek omgekeerd evenredig aan den beschikbaren tijd van een vol uur. En nu is het wel waar, dat veel tijd veel debat maakt, anderzijds moet er toch ook voldoende tijd zijn om de belangen der vereeniging en van schoolhygiënische quaesties te bespreken en die tijd was nu te kort.

Terstond al kwamen de tongen los toen het bestuur mededeeling deed van het perscommuniqué inzake de technische herziening op de lageronderwijswet. Het protest van het bestuur tegen slechter worden der hygiënische toestanden ging sommigen niet ver genoeg, anderen vonden het te vaag en wenschten cijfers en getallen genoemd te zien. Weer anderen wilden actie inzake wijziging van het bouwbesluit en een lid stelde voor zich nog eens ten spoedigste tot de leden der Tweede Kamer te richten. Tenslotte werd aan het bestuur opgedragen de noodige stappen te doen in den geest van het debat en allereerst zich tot de leden der Tweede Kamer te richten.

Ook het „Tijdschrift voor Sociale Geneeskunde” bleef niet onaangetaast. De naam kon niet allen bekoren uit vrees voor verwarring met een bestaand tijdschrift en de naamsverandering van ons orgaan werd betreurd. Het aanwezige redactielid mevr. FURSTNER redde bestuur, redactie en den goeden nieuwen naam van het Tijdschrift door eene afdoende toelichting.

Toen kwam het punt van de regeling der benoeming der redactieleden, waarover in de vorige vergadering een voorstel was geformuleerd. Dit voorstel werd na eenige discussie aangenomen, zoodat van de redacteuren onzer vereeniging volgens rooster elk jaar één aftreedt en slechts eenmaal herbenoembaar is. Bekleedt het betrokken lid echter de functie van redacteur-secretaris dan is dit lid geregeld herkiesbaar.

Het spreekt van zelf dat deze regeling alleen geldt voor de drie redactieleden der Vereeniging van Schoolartsen.

Daarop kwam de netelige quaestie van de wijze van vergaderen opnieuw ter sprake.

De twee proefvergaderingen zijn met deze afgelopen en nieuwe voorstellen moeten gedaan worden en een nieuwe beslissing genomen worden. De geesten werden wakker en spoedig spookten de dreigende geesten genaamd duurte, afjakkeren, overlading, uitbreken uit practijk rond, als wilden zij het niet buitengewoon solide huisje waarin de in lossen echtelijken band vereenigde G.G.V. en N. V. Sch. samenwonen, wegtooveren en de gelieven wreed scheiden.

Tegen deze gevaren werden remedies aangegeven en een der geneesheeren gaf als voorschrift: voortgaan, aanpassen laten en nauwere band tot ineensmelting als ideaal toestand van een goed huwelijk. Een ander wilde een der echtelieden uit logeeren zenden en nog eens eenmaal afzonderlijk vergaderen ter rustige bespreking, een volgend raadsman wilde 3 vergaderingen, 1 gecombineerd en voor elke vereeniging 1 afzonderlijk, etc. etc.

En de breede schouders van het bestuur kregen ook dezen last te dragen als af te werken ruw materiaal en vol verwachting

klopt ons hart of en hoe de volgende maal ons samenkomen weer zal zijn. . . „Laurentia liebe”. . . enz.

Toen de rondvraag, een rondedans van lichamelijke opvoeding voor normalen en zwakken, enquête-commissie toezicht middelbaar onderwijs en de snelvoetige enquête-commissie PAMEIJER, epidemiewet en als apotheose de belofte voor een cursus in kinder- en schoolhygiëne en toen de donderslag, de sluitingsklap van den voorzittershamer en toen. . . stilte. . . wachten op de blanke broeders der G.G.V. om de vredespijp te rooken en te luisteren naar v. d. Loo. . . wachten. . .

Totdat de voorzitter opnieuw percussie pogingen deed en v. d. Loo ons vergastte op een voordracht over zijne reeds in monografieën gepubliceerde methode over het opsporen van zwakke kinderen en het onderkennen van zwakken en ondervoeden. Het debat was uitgebreid, gaf blijk van groote waardeering voor v. d. Loo's werk, maar toonde ook, dat nog niet ieder was bekeerd tot de overtuiging der bruikbaarheid en noodzakelijkheid der methode en zelfs waren er die afkeerig waren van alle meet- en weegformules.

Anderen wenschten slechts toepassing op groepen en niet op individuen, een ander wenschte rekening te houden met den leeftijd erbij en met vereende krachten zou er veel afgebroken zijn als niet v. d. Loo de beteekenis zijner methode in zijn antwoord zeer juist afgebakend had door haar te noemen een diagnosticum méér bij de vele andere, die we nu reeds bezitten en een nieuw stapje verder zoodals al onze andere diagnostica, die we nu als oudeigendom hebben. eenmaal nieuwe, aangevochten, bescheiden stapjes zijn geweest.

LUBSEN vond ons, verzadigd door den lunch in een meer vreedzame, minder aggressieve stemming. Zijn interessante causerie, tot wanhoop van uwen secretaris voor de vuist gesproken, over wat Amsterdam reeds doet op het gebied van psychotechniek was boeiend van begin tot einde.

Zij lokte niet te veel discussie uit ook al kwam een oogenblik om den hoek kijken de principieele quaestie van psychologisch onderzoek in de breedte, alles omspannend, of toegespitst, geconcentreerd, in de diepte van een bepaald gespecialiseerd beroep doordringend en terwijl daarnaast ook het vraagstuk der psychologische controle van geschiktheid voor een bepaald, gekozen vak of het uitzoeken van een vak ten behoeve van den candidaat even besproken werd.

De dank van den voorzitter aan beide sprekers was zeker niet onverdiend, zij hebben veel bijgedragen tot het slagen dezer wintervergadering.

VAN DER HOEVE.

## Ned. Ver. v. Gem. Geneesk. Verzorging Jaarverslag 1922.

De Vereeniging ging dit jaar merkbaar vooruit; behalve verschillende personen gaven zich ook Geneeskundige Diensten als lid op. Er werd hard gewerkt, voornamelijk door de redactie van het Tijdschrift. Dit laatste zal onder den naam „Tijdschrift voor Sociale Geneeskunde” na 1 Januari bij een anderen uitgever verschijnen en het zal aanmerkelijk worden uitgebreid en verbeterd.

Op de beide halfjaarlijksche Congressen werden een aantal belangrijke onderwerpen behandeld. Verslagen daarvan verschenen in het Tijdschrift en in de groote pers. In de Zomervergadering werd ingeleid: „vrije artsenkeus voor armlastigen” door L. HEYERMANS en „maatschappelijk ongeschikten” door Dr. F. S.

Beschikbaar



Besturen en eenige leden der Ned. Ver. v. Schoolartsen en der Ned. Ver. v. Gem. Geneesk. Verzorging  
gecombineerde vergadering in het American-Hotel te Amsterdam op 17 Dec. 1922.

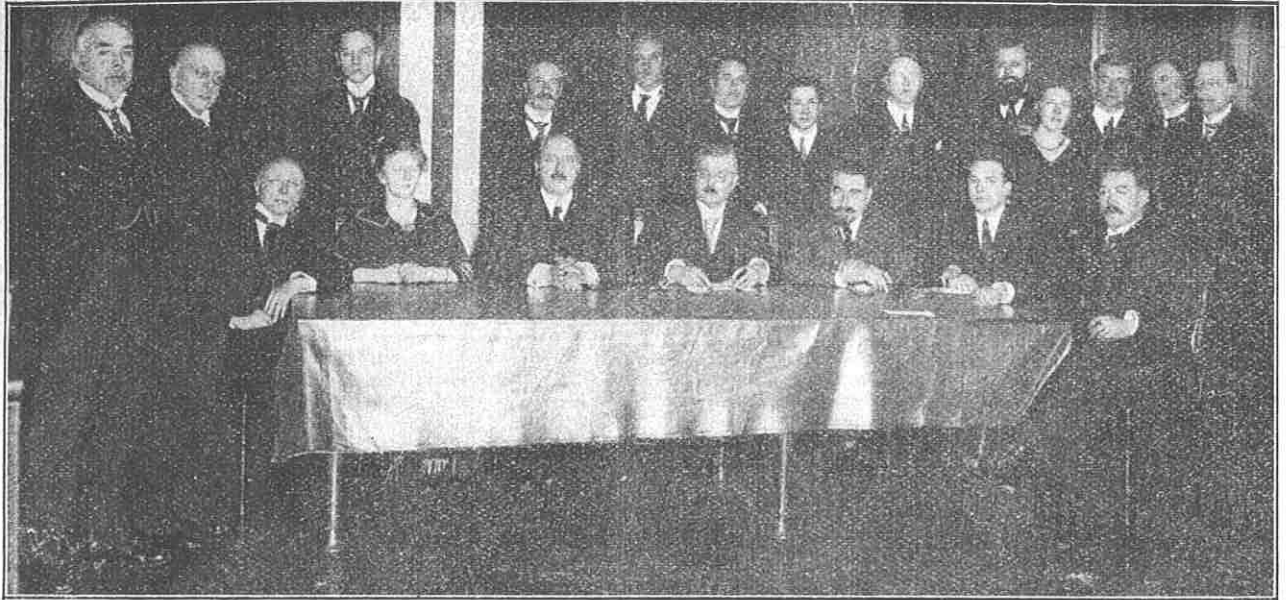

Dr. v. d. Hoeve, Dr. van Vliet, Dr. Deyll, Dr. Suyling, Dr. Heyermans, Dr. v. Det, Dr. Buyze.

MEYERS; in de Wintervergadering „gemeentelijk ziekenfonds” door Dr. A. SCHUCKINK KOOL; „openlucht of gezondheidscholen” door Dr. R. P. VAN DE KASTEEL en „taak der consultatiebureaux” door Dr. M. D. HORST.

Er zijn vele teekenen die er op wijzen dat de studiecongressen der G.G.V. en van de Schoolartsenvereniging steeds meer belangstelling gaan wekken. Verschillende autoriteiten woonden regelmatig de vergaderingen bij als ook particuliere artsen die rechtstreeks of zijdelings met het gebied der sociale geneeskunde in aanraking komen.

De financiële toestand der vereniging is zeer gunstig.

December 1922.

A. VAN DET, Secretaris.

### Kort verslag van de Algemeene Vergadering der G.G.V. op 16 en 17 Dec. te Amsterdam.

Als gasten aanwezig o.a. Dr. OOSTERBAAN, Hoofdinspecteur; Mej. Dr. BADER, Inspectrice en Dr. TUNTNER, Inspecteur van Volksgezondheid Dr. SIEBURGH, Inspecteur Koloniehuisen en Dr. I. H. J. VOS, Wethouder voor Openbare Gezondheid te Amsterdam, terwijl van 2 Wethouders der gemeente Utrecht bericht van verhindering was ingekomen.

De voorzitter, de heer HEYERMANS, opent de vergadering en wenscht enkele opmerkingen van algemeenen aard te maken. In de eerste plaats over het wetsontwerp „Gezondheidsdiensten”. Dit wordt door de regeering gehandhaafd. Het blijft echter veel te lang in de lucht zweven. Het ontbreken van een rijksregeling werkt sterk remmend. Tal van gemeenten stellen hun plannen maar steeds uit tot men weet wat de Regeering zal doen. Ook wordt overal te pas en te onpas het bezuinigen er bij gehaald. Laat men oppassen, zegt spreker. Verkeerd toegepaste bezuiniging en het verzuimen van dringende sociale maatregelen moet zich later wreken door enorme uitgaven. Vervolgens bepleit spreker de noodzakelijkheid van uniformiteit van formulieren in gebruik bij de verschillende Geneeskundige Diensten in het land. Na eenig debat wordt besloten dit vraagstuk in studie te nemen, waartoe een commissie zal worden ingesteld.

Hierna komt de heer SCHUCKINK KOOL aan het woord om een inleiding te houden over „Gemeentelijk Ziekenfonds”.

Spr. ging kort na het ontstaan van Geneeskundige Diensten en hun taak en besprak de categoriën menschen die door deze Diensten geholpen worden. „Wat moeten we echter doen met de z.g.n. fluctueerende laag, de menschen die nu eens ziekenfondslid zijn, dan weer armalstig”. Spr. zou die allen in een Gemeentelijk Ziekenfonds willen onderbrengen, d.w.z. tegen betaling van hetzelfde bedrag als de gewone ziekenfondspremie door de Geneeskundige Dienst laten behandelen desnoods op een apart spreekuur en met recht op beperkte vrije artskeuze.

Bij het debat werd er op gewezen dat gewoonlijk onder een ziekenfonds iets anders verstaan wordt, namelijk een lichaam waarbij alle artsen en apothekers zich kunnen laten inschrijven en het bestuur gevormd wordt door belanghebbenden.

Als tweede inleider trad op Dr. M. D. HORST, Directeur G.G.D. te Leiden met het onderwerp: „De taak der consultatiebureaux”. Spreker liet de verschillende categoriën consult.-bur. de revue passeeren, n.l. die voor tuberculoselijders, geslachtsziekte, drankbestrijding en zuigelingencontrole. Van ieder afzonderlijk werden doel en organisatie besproken. Het debat liep voornamelijk over de vraag of aan de bureaux al of niet behandeld moest worden. Algemeene conclusies werden niet getrokken. Dit is een vraagstuk van opportuniteit.

De derde inleider Dr. R. P. VAN DE KASTEEL sprak over het onderwerp: „Openlucht- of Gezondheidsscholen”. Spreker houdt een vurig pleidooi voor openluchtscholen en geeft voornamelijk aan de hand van zijn ervaringen in den Haag een uitvoerige beschrijving over de werking en organisatie van een dergelijke inrichting. Tevens geeft hij aan, welke categoriën kinderen er zijns inziens in aanmerking komen om op deze school geplaatst te worden. Hij meent, dat de resultaten zooals hij ze heeft gezien niet met gezondheidsscholen in de steden zelf te bereiken zijn.

In een zeer geanimeerd debat werd deze meening bestreden. In steden die geen bosch of duinen in de onmiddellijke nabijheid hebben, levert het vervoer onoverkomelijke moeilijkheden op, terwijl ook de moeilijkheid van een juiste selectie der kinderen naar voren werd gebracht. De inleider zeide in zijn repliek dat inderdaad door plaatselijke omstandigheden ge-

dwongen, men met gezondheidsscholen zou moeten werken, doch dat voor bepaalde categoriën kinderen openluchtscholen z.i. onmisbaar waren.

Zondagmorgen werd de huishoudelijke vergadering gehouden. Vermeldenswaard is alleen dat besloten werd een openbare vergadering te houden ter bespreking van *het vaccinatie vraagstuk*.  
De Secretaris, A. VAN DET.

De leden worden dringend verzocht om, wanneer zij onderwerpen hebben die zij gaarne zouden behandeld zien op de vergaderingen der G.G.V., deze zoo spoedig mogelijk op te geven aan den Secretaris A. VAN DET, Heerengracht 84, Amsterdam. Zouden de leden tevens willen berichten of zij bij de volgende vergaderingen de Zaterdagavond boven den middag zouden prefereren?

## DIENSTEN

### Jaarverslag Gemeentelijke Geneeskundige Dienst te 's Gravenhage over 1921.

De inleiding levert een pleidooi voor de beginselen van den Haagschen dienst: „waarbij de idee besturen boven beheeren aldoor ten richtsnoer heeft gediend”, m.a.w. door particulieren wordt veel sociaal-medisch werk verricht, onder medebestuur van den G.G.D. We lezen dat de band met den schoolartsdienst werd versterkt, hetgeen wel zeer noodzakelijk zal geweest zijn.

Het geneeskundig personeel van den dienst bestaat uit 1 Directeur, 4 controleerende-, 8 behandelende artsen en 1 hygiënist.

In bijzonderheden worden de gevallen meegedeeld waarvoor „de geneeskundige éénheid: geneesheer, verpleger en chauffeur-helper” hulp verleende. Men vraagt zich af of de arts hierbij niet zeer dikwijls geheel overbodig is. De controle-bezoeken voor aanvragen tot opname in ziekenhuizen geschieden met dezelfde ziekenauto: dan ligt er een voordeel in dat bij werkelijke spoed de arts zelf den patiënt direct kan meenemen.

Krankzinnigen worden meestal opgenomen na een kort verblijf in het isoleervertrek van het Centraal Bureau: dit wordt een voordeel geacht, echter de verslaggever zegt dat een ruimere gelegenheid voor observatie buiten het eigenlijke gesticht meer en meer de aandacht vraagt.

Een deel van het gemeentepersoneel had vroeger recht op vrije geneeskundige hulp; op dit recht is het uitstervingsstelsel toegepast; thans reeds zijn vele van de nog rechthebbenden tevens bij een ziekenfonds aangesloten.

De vereniging voor kraamverzorging wordt door de Gemeente gesteund met dien verstande dat een vergoeding wordt gegeven voor iedere ten genoegen van het Gemeentebestuur afgeleverde gediplomeerde kraamverzorgster. Zij bezoeken de kraamvrouwen gedurende 14 dagen.

Bij het hoofdstuk betreffende geneeskundige controle worden de ziektemeldingen verdeeld over de verschillende takken van dienst; men mist hier noode een opgave van het aantal personen bij die diensttakken te werk gesteld.

Er bestaat een commissie voor hooger beroep die in 7 gevallen uitspraak deed: 6 gevallen betroffen een vermeende onjuiste beslissing van een controleerende gemeentearts, die echter steeds door de commissie in het gelijk werd gesteld.

Van het hygiënische werk is de cyanering een belangrijk onderdeel. De wet waarbij bepaalde regelen gesteld zijn bij ontsmettingen, waarbij blauwzuur bevattende stoffen gebruikt worden, is het gevolg van een advies door den Geneeskundigen Dienst aan B. en W. van den Haag uitgebracht.

De bestrijding der vulvo-vaginitis schijnt niet geheel naar wensch te zijn geslaagd, doch het verslag is hieromtrent ietwat vaag.

Overigens bevat het zeer veel wat ook reeds een vorig jaar werd opgenomen, met name beschrijvingen van bepaalde werkmethode en inrichtingen. E.

### Jaarverslag Gemeentelijke Geneeskundige Dienst te Utrecht over 1921.

Het medisch personeel bestond, behalve uit den Directeur, uit 7 artsen: het verplegend personeel uit 5 mannen en 9 vrouwen.

Er werd een overeenkomst afgesloten met de afd. Utrecht der Ned. Ver. ter bestrijding der tuberculose, om door haar bemiddeling *t.b.c.-patienten*, die anders door den G.G.D. zouden zijn uitgezonden in sanatoria te plaatsen. De omslachtige methode, die gebruikt moet worden om voor de Gemeente *rijkssubsidie* te krijgen bij het uitzenden van deze lijdens, zou — aldus het verslag — niet noodig zijn, bij breeder inzicht van de afd. tuberculosebestrijding van het Departement van Arbeid.

Van de gekeurde kandidaten voor gemeentebetrekingen werden 15% afgekeurd. De juiste opmerking wordt gemaakt dat ter beoordeeling der resultaten der *geneeskundige controle*, onderlinge vergelijking der verschillende steden nog zeer moeilijk gaat. Inderdaad ware het te wenschen dat de intercommunale statistiek wat meer had in te brengen, waardoor de zoo noodige uniformiteit wellicht ware te bereiken.

*Schoolkinderen* worden nu ook onderzocht, in het laatste leerjaar; dan wordt tevens advies bij de keuze van een beroep gegeven. *Schoolvoeding* wordt voortaan alleen verstrekt op medisch advies en de verslaggever acht dit meer in overeenstemming met de (leerplicht-) wet dan dat de financiële gesteldheid van het gezin den doorslag geeft. Het wil mij voorkomen dat de wet, die in de toelichting van het desbetreffend artikel spreekt van *behoefte kinderen*, niet spreekt zooals het Utrechtsche verslag dit aangeeft. Misschien wil de Directeur zijn opvatting eens nader toelichten in ons orgaan.

Het *technisch gedeelte* van het verslag bevat veel staten, die minder geschikt zijn voor een bespreking. B.

### Gem. Geneesk. Dienst van Amsterdam.

Begin Januari werden 2 *nieuwe ambulance auto's* in dienst gesteld. Het koetswerk is korter dan dat van het vorige type, zoodat de wagens gemakkelijker te besturen zijn. Door een ietwat andere inrichting van het inwendige, is de beschikbare ruimte niet verminderd.

## BERICHTEN

### Samenwerking en bezuiniging.

Het verknoeien van tijd en geld en arbeidskracht is steeds meer aanleiding tot plannen die ten doel hebben meer concentratie van het werk op het gebied der sociale geneeskunde. SIR W. C. GULL zet uiteen dat voor moeder- en zuigelingenverzorging, voor de schoolverpleging en voor de tuberculosebestrijding één en dezelfde zuster kan optreden en door huisbezoek voor verschillende doeleinden het vertrouwen van het publiek kan winnen.

Dit is dus hetzelfde stelsel als veelal ten plattelande wordt toegepast als de wijkverpleegster tevens tuberculose-huisbezoekster is. Getuige o.a. de voordracht van DR. ELIAS in de zomervergadering van schoolartsen, is ook hier te lande de belangstelling in deze richting groeiende. (Health).

In de volgende afleveringen zullen o.a. artikelen worden opgenomen van

Dr. J. A. Pulto - „Crèches”

Dr. I. H. J. Vos - „De Melkvoorziening der groote steden” (vervolg)

Ir. J. van der Breggen - „Volksgezondheid”
